# Supplementary material for: A cytotoxic bis(carbene)gold(i) complex of ferrocenyl complexes: synthesis and structural characterisation
Source: Royal Society of Chemistry journal article supplement (doi:10.1039/b713917a), 2007-12-12
Supplement: b713917a.pdf [file b713917a.pdf]

**Supporting information for:**

**A cytotoxic bis(carbene)gold(I) complex of ferrocenyl complexes:  
synthesis and structural characterisation**

Ulrike E. I. Horvath,<sup>a</sup> Gino Bentivoglio,<sup>b</sup> Michael Hummel,<sup>b</sup> Herwig Schottenberger,<sup>b</sup> Klaus Wurst,<sup>b</sup> Margo J. Nell,<sup>c</sup> Constance E. J. van Rensburg,<sup>c</sup> Stephanie Cronje,<sup>a</sup> Helgard G. Raubenheimer,<sup>a,\*</sup>

<sup>a</sup> Department of Chemistry and Polymer Science, University of Stellenbosch, Private Bag X1, Matieland, 7602, South Africa. Tel: +27 21 808 3850, Fax: +27 21 808 3849. *E-mail*: hgr@sun.ac.za, uhorvath@gmail.com.

<sup>b</sup> Institut für Allgemeine, Anorganische und Theoretische Chemie, Leopold Franzens Universität, Innrain 52a, A-6020 Innsbruck, Austria.

<sup>c</sup> Department of Pharmacology, Faculty of Medicine, University of Pretoria, P.O. Box 2034, Pretoria 0001, South Africa.

**Table of Contents**

|                                                                                                                                                  |      |
|--------------------------------------------------------------------------------------------------------------------------------------------------|------|
| Title Page                                                                                                                                       | SI-1 |
| TOC                                                                                                                                              | SI-1 |
| General Procedures                                                                                                                               | SI-2 |
| Alternative Preparation Method for 1-(4-ferrocenylphenyl)imidazole ( <b>1</b> )                                                                  | SI-2 |
| IR spectrum (KBr) of 1-[( <i>E</i> )-2-butenyl]-3-(4-ferrocenylphenyl)imidazolium bromide ( <b>2</b> )                                           | SI-2 |
| IR spectrum (KBr) of 1-[( <i>E</i> )-2-butenyl]-3-(4-ferrocenylphenyl)imidazolium tetrafluoroborate ( <b>3</b> )                                 | SI-2 |
| IR spectrum (KBr) of bis{1-[( <i>E</i> )-2-butenyl]-3-(4-ferrocenylphenyl)-2 <i>H</i> -imidazol-2-ylidene}gold(I) tetrafluoroborate ( <b>4</b> ) | SI-2 |

## General Procedures

Reactions were carried out under argon using standard Schlenk and vacuum-line techniques. All solvents were dried according to standard literature methods under nitrogen atmosphere.<sup>1</sup> The infrared spectra were recorded on a Nicolet Avatar 330 FT-IR with ATR (attenuated total reflection) accessory (Smart Performer) or on a Nicolet 5700 FT-IR with ATR diamond window. Starting materials are commercially available and were used without further purification.

### Alternative preparation of 1-(4-ferrocenylphenyl)imidazole, 1

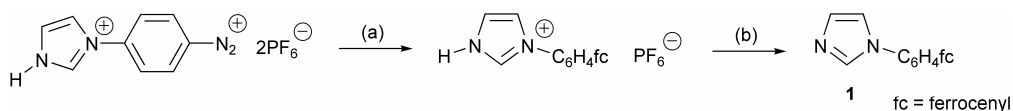

Scheme S1. Alternative synthetic method for **1**: (a) Ferrocene, DMSO/acetone; (b) NaHCO<sub>3</sub>.

Compound **1** was also prepared by the portionwise addition of 4-(1*H*-imidazolyl)phenyldiazonium bis(hexafluorophosphate) (2.06 g, 4.45 mmol) to a solution of ferrocene (3.31 g, 17.8 mmol) in a mixture of DMSO and acetone (1:3) (50 ml). Upon ultrasonication, gas evolution and a darkening of the reaction mixture was observed. After complete addition of the diazonium salt, the mixture was ultrasonically radiated for another 30 min. Acetone was removed *in vacuo* to yield a precipitate, which was filtered off. The filtrate was washed several times with *n*-hexane to remove residual ferrocene, followed by addition of a saturated NaHCO<sub>3</sub> solution (200 ml). The mixture was extracted with CH<sub>2</sub>Cl<sub>2</sub> (3 x 30 ml), washed with H<sub>2</sub>O (1 x 100 ml) and dried over Na<sub>2</sub>SO<sub>4</sub>. The crude product solution was reduced to 2 ml and chromatographed on a column, charged with silica gel 60 (50 g), with diethyl ether/CH<sub>2</sub>Cl<sub>2</sub> (1:1) as eluent. The dark orange fraction was collected and dried *in vacuo*, to yield red-brown, microcrystalline material (0.34 g, 16%).

### IR spectrum (KBr) of 1-[(*E*)-2-butenyl]-3-(4-ferrocenylphenyl)imidazolium bromide, 2

$\nu_{\max}(\text{KBr})/\text{cm}^{-1}$  3165m, 3090s, 3066s, 2964s, 2854m, 1614s, 1552vs, 1412s, 1203s, 1105s, 1068s, 1030s, 974m, 887m, 845s, 825vs, 808s, 737s, 640s, 619s, 540m, 507s and 490s;

### IR spectrum (KBr) of 1-[(*E*)-2-butenyl]-3-(4-ferrocenylphenyl)imidazolium tetrafluoroborate, 3

$\nu_{\max}(\text{KBr})/\text{cm}^{-1}$  3165s, 3090s, 3028s, 2854m, 1616m, 1566s, 1556s, 1402s, 1107vs, 1070vs, 1032vs, 887w, 835m, 812m, 752m, 627m, 532m, 520m, 509m, 486m and 463m.

### IR spectrum (KBr) of bis{1-[(*E*)-2-butenyl]-3-(4-ferrocenylphenyl)-2*H*-imidazol-2-ylidene}gold(I) tetrafluoroborate, 4

$\nu_{\max}(\text{KBr})/\text{cm}^{-1}$  3167w, 3136w, 2983m, 2964m, 1606w, 1529s, 1491m, 1460m, 1423m, 1261m, 1174s, 1105vs, 1084vs, 1030vs, 968m, 887m, 820s, 800s, 743m and 520s;

## References

- 1 R. J. Errington, *Advanced Practical Inorganic and Metalorganic Chemistry*, Chapman & Hall, London, 1997, pp. 296.
